# Supplementary material
Source: Springer Nature journal article supplement (https://www.springermedizin.de/resource/supplementary/12936_2007_524_MOESM1_ESM.pdf/9548188)
Supplement: MOESM1 [file 9548188]

**Table A: Timing and sample sizes of net follow-up surveys**

| Survey | Date           | Total sample | Study round 1          |                | Study round 2          |                |
|--------|----------------|--------------|------------------------|----------------|------------------------|----------------|
|        |                |              | # of nets surveyed     | Months elapsed | # of nets surveyed     | Months elapsed |
| 0      | 23.-30.12.2000 |              | <i>590 distributed</i> |                |                        |                |
| 1      | 14.-17.02.2001 | 590          | 590                    | 1.6            |                        |                |
| 2      | 12.-15.05.2001 | 590          | 590                    | 4.5            |                        |                |
| 3      | 06.-12.10.2001 | 509          | 509                    | 9.4            |                        |                |
| 4      | 21.-28.12.2001 | 505          | 505                    | 11.8           |                        |                |
| 5      | 26.-30.04.2002 | 463          | 463                    | 16.0           |                        |                |
| 6      | 01.-05.09.2002 | 442          | 442                    | 20.1           |                        |                |
| (0)    | 10.-15.10.2002 |              |                        |                | <i>260 distributed</i> |                |
| 7 (1)  | 07.-10.02.2003 | 466          | 210                    | 25.4           | 256                    | 3.8            |
| 8 (2)  | 13.-15.04.2003 | 452          | 194                    | 27.5           | 258                    | 6.0            |
| 9 (3)  | 02.-05.09.2003 | 355          | 140                    | 32.1           | 215                    | 10.6           |
| 10 (4) | 07.-11.02.2004 | 301          | 128                    | 37.4           | 174                    | 15.8           |
| 11 (5) | 22.-26.10.2004 | 215          | 90                     | 45.8           | 125                    | 24.2           |
| 12 (6) | 12.-13.04.2005 | 159          | 78                     | 51.4           | 81                     | 29.8           |
| 13 (7) | 11.-13.10.2005 | 152          | 81                     | 57.3           | 71                     | 35.8           |
